# Supplementary material for: THP-1 macrophage cholesterol efflux is impaired by palmitoleate through Akt activation
Source: PubMed Central journal article supplement (PMC7241781; doi:10.1371/journal.pone.0233180), 2020-05-21

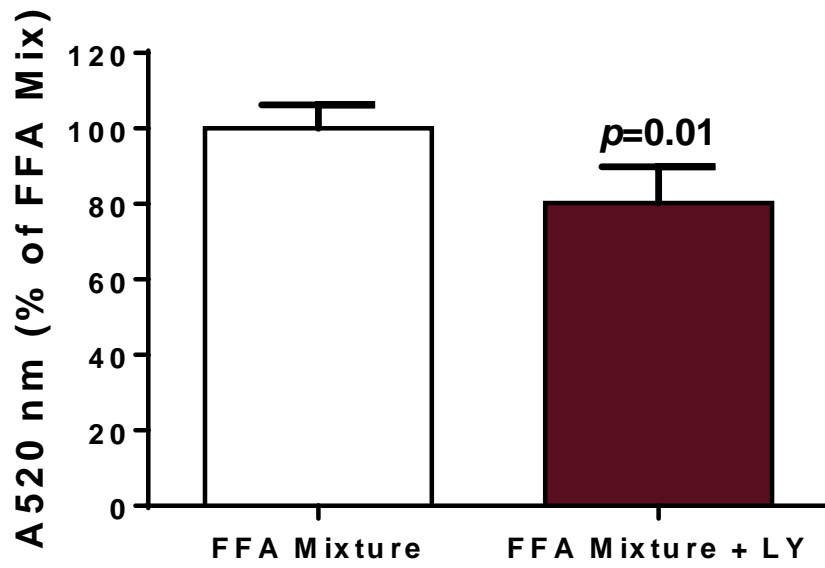

Supplement: pone.0233180.s007.pdf [file pone.0233180.s007.pdf]
