# Supplementary material for: THP-1 macrophage cholesterol efflux is impaired by palmitoleate through Akt activation
Source: PubMed Central journal article supplement (PMC7241781; doi:10.1371/journal.pone.0233180), 2020-05-21

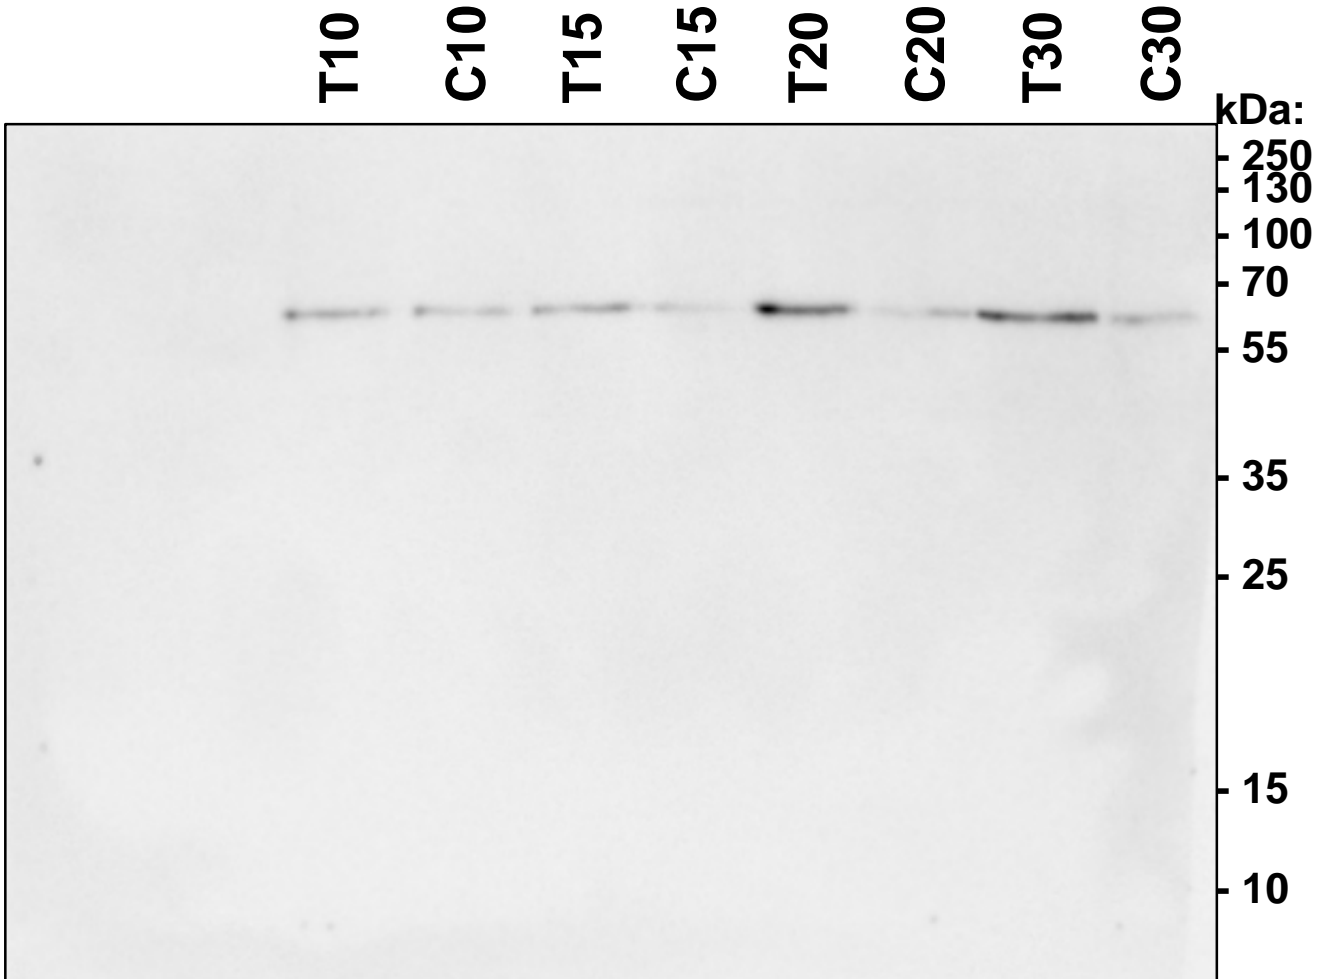

Samples from  
unrelated  
experiments

**T120**    **C120**    **T480**    **C480**    **T1080**    **C1080**

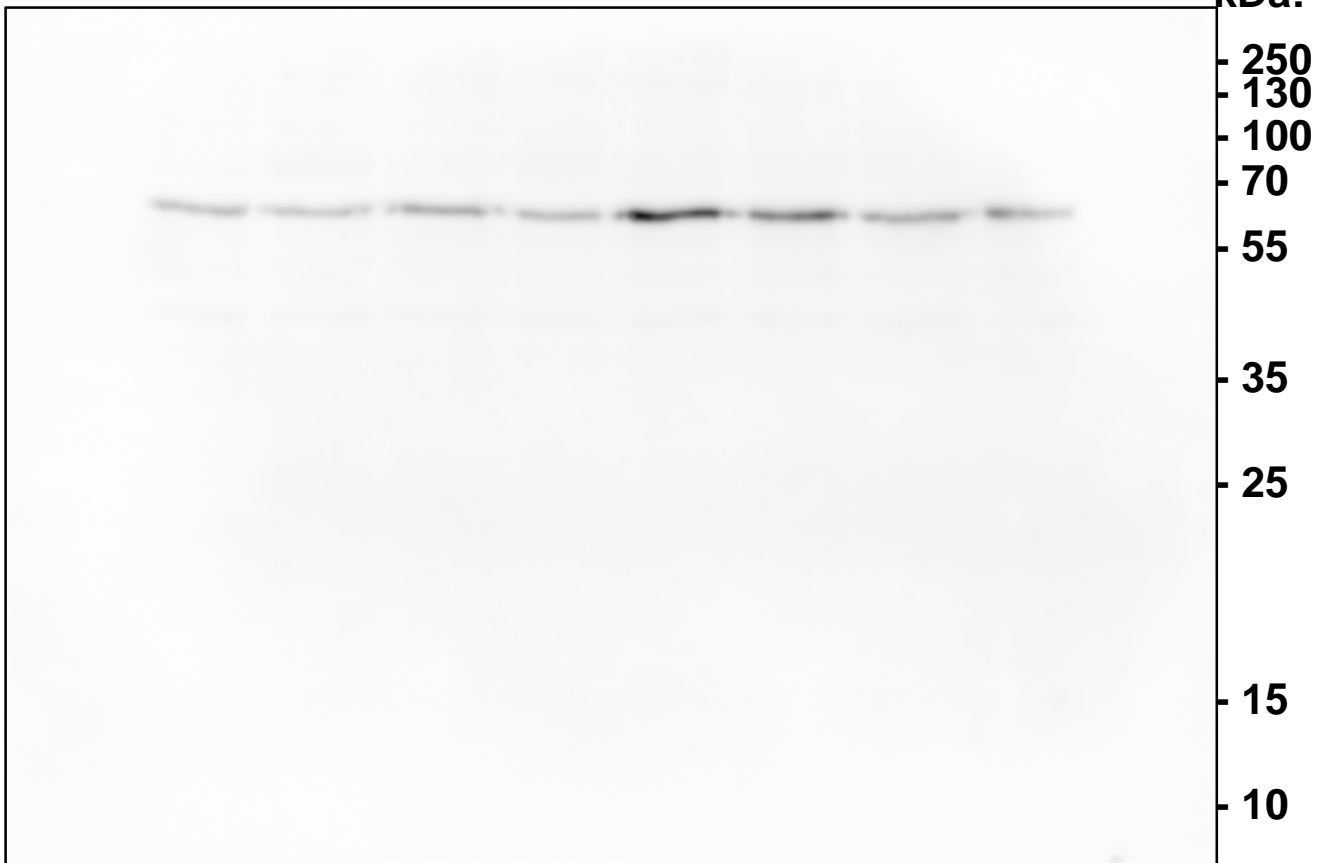

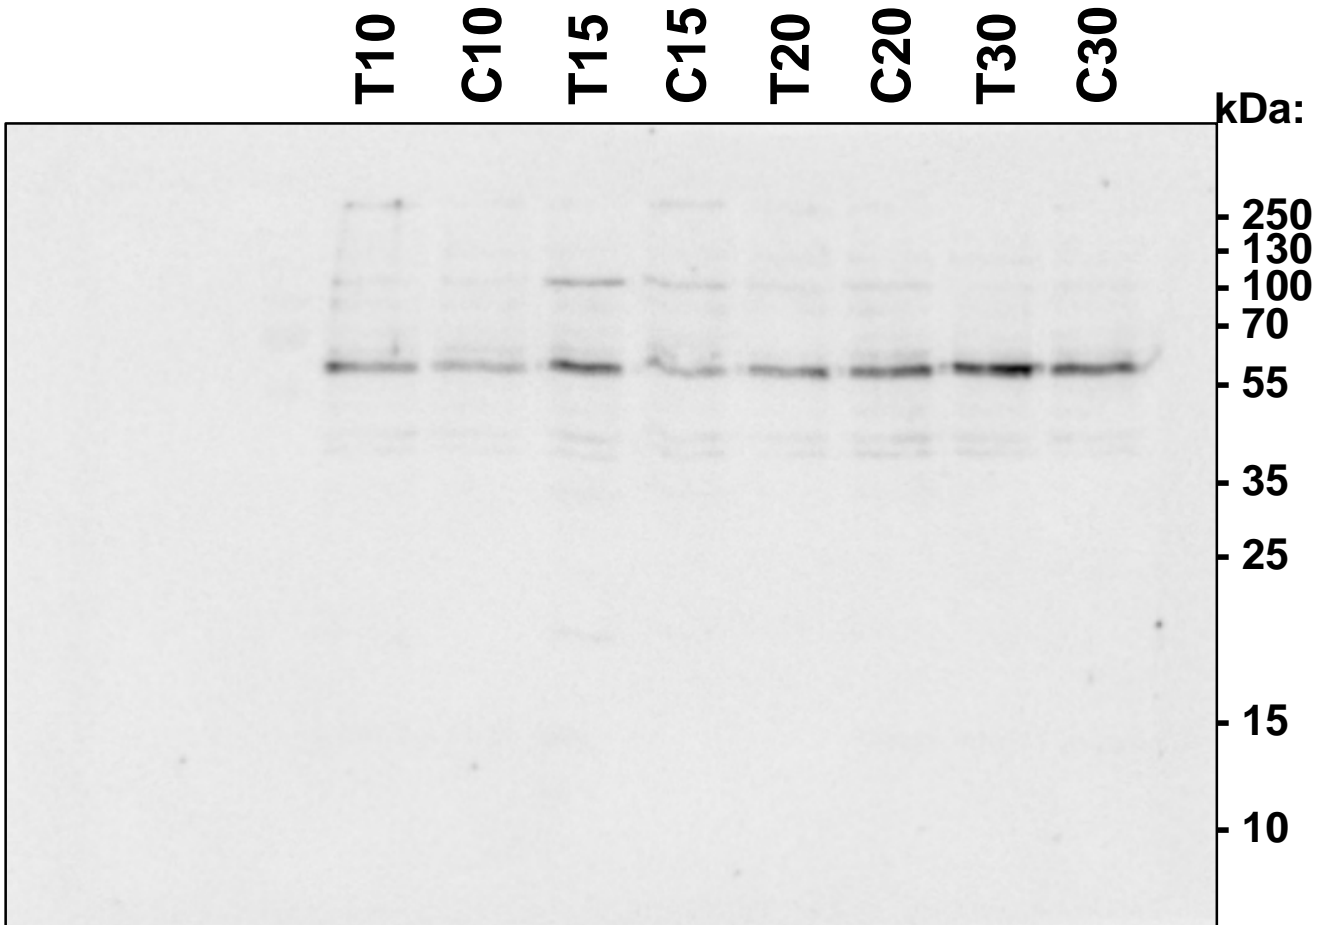

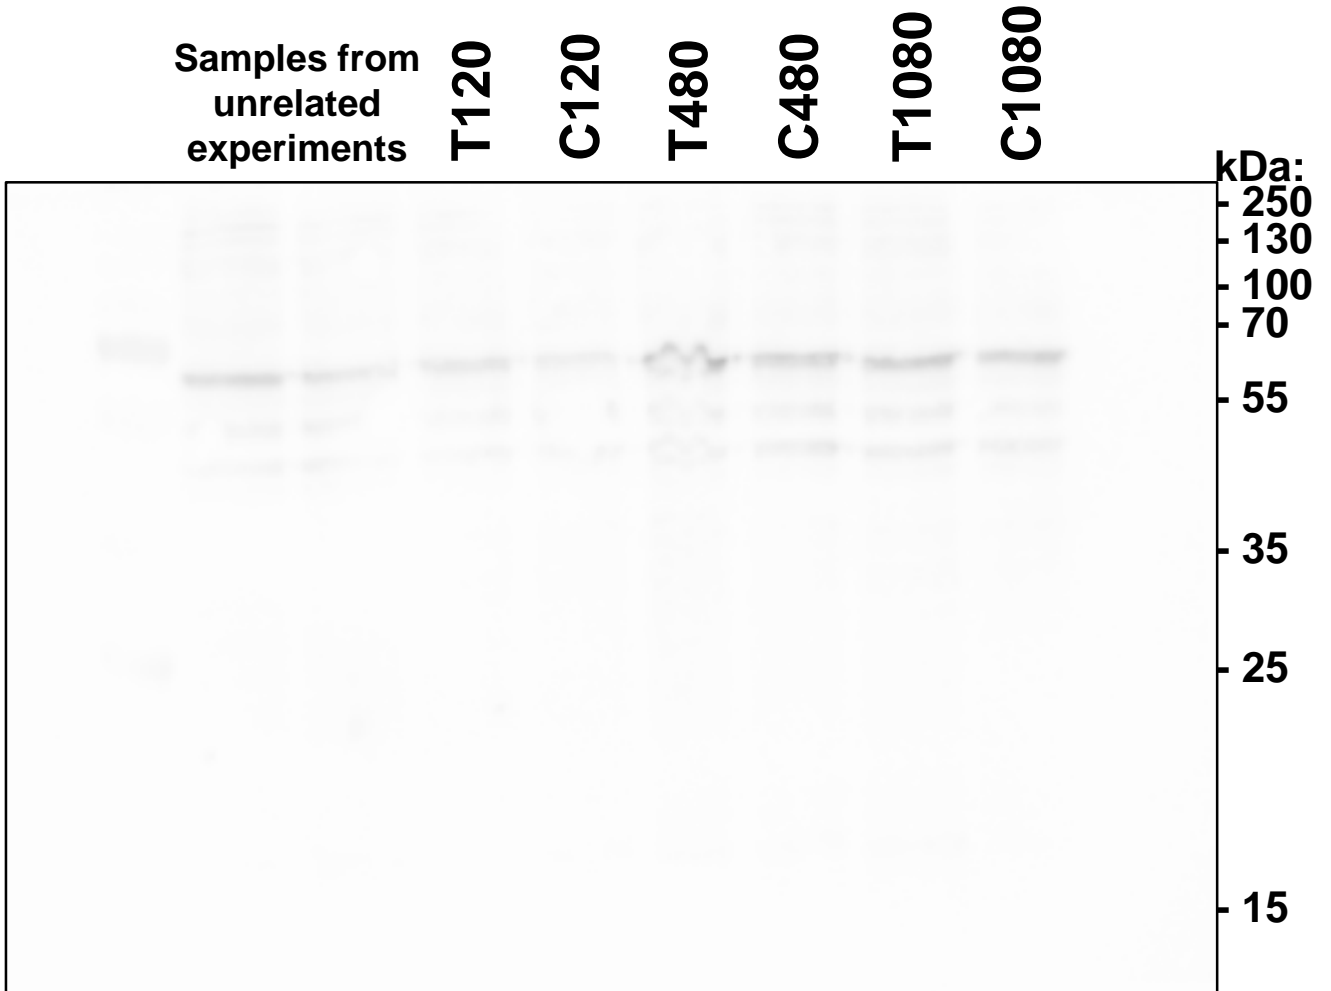

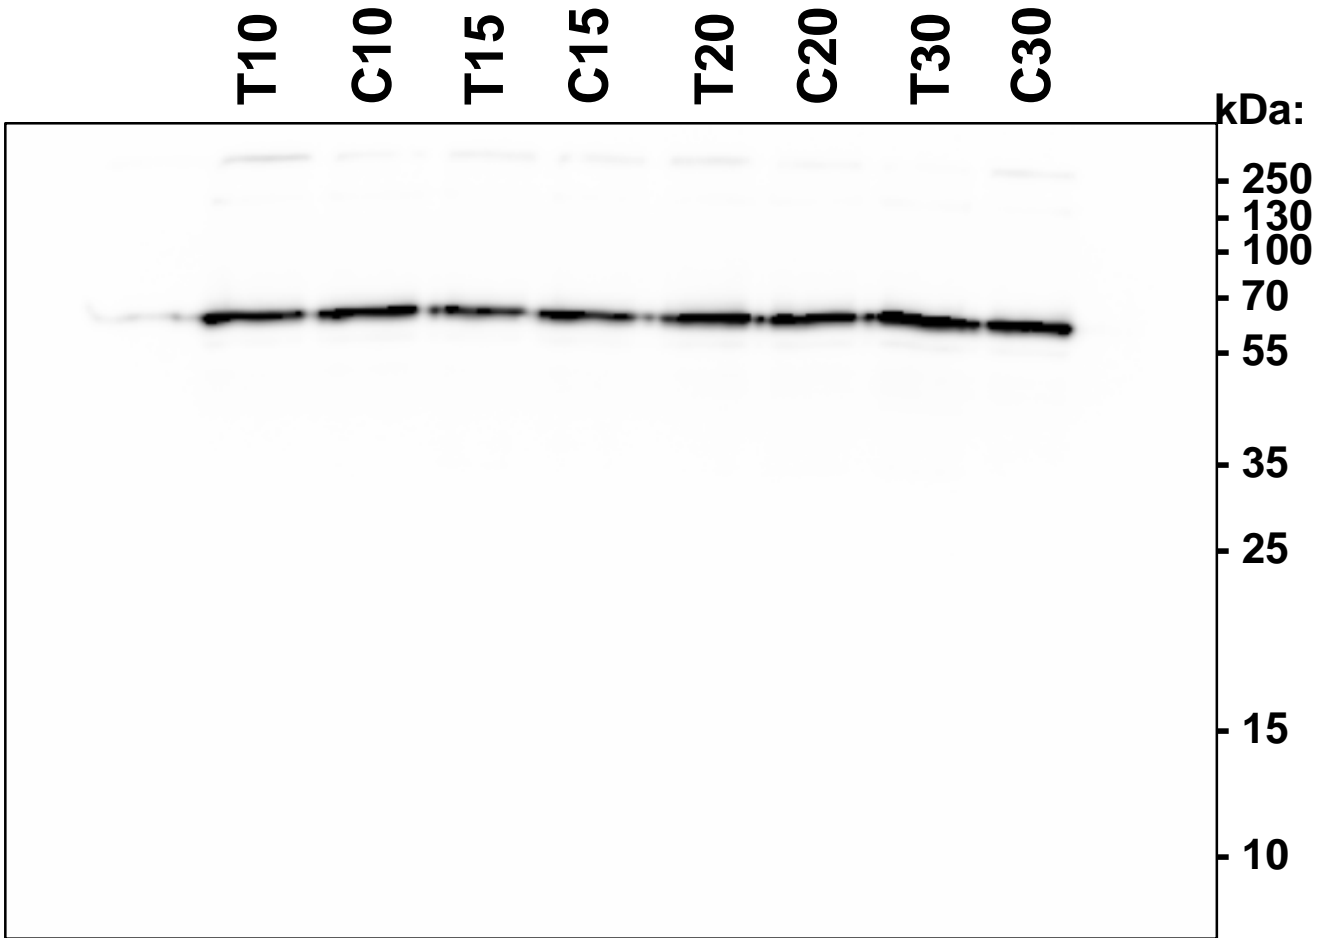

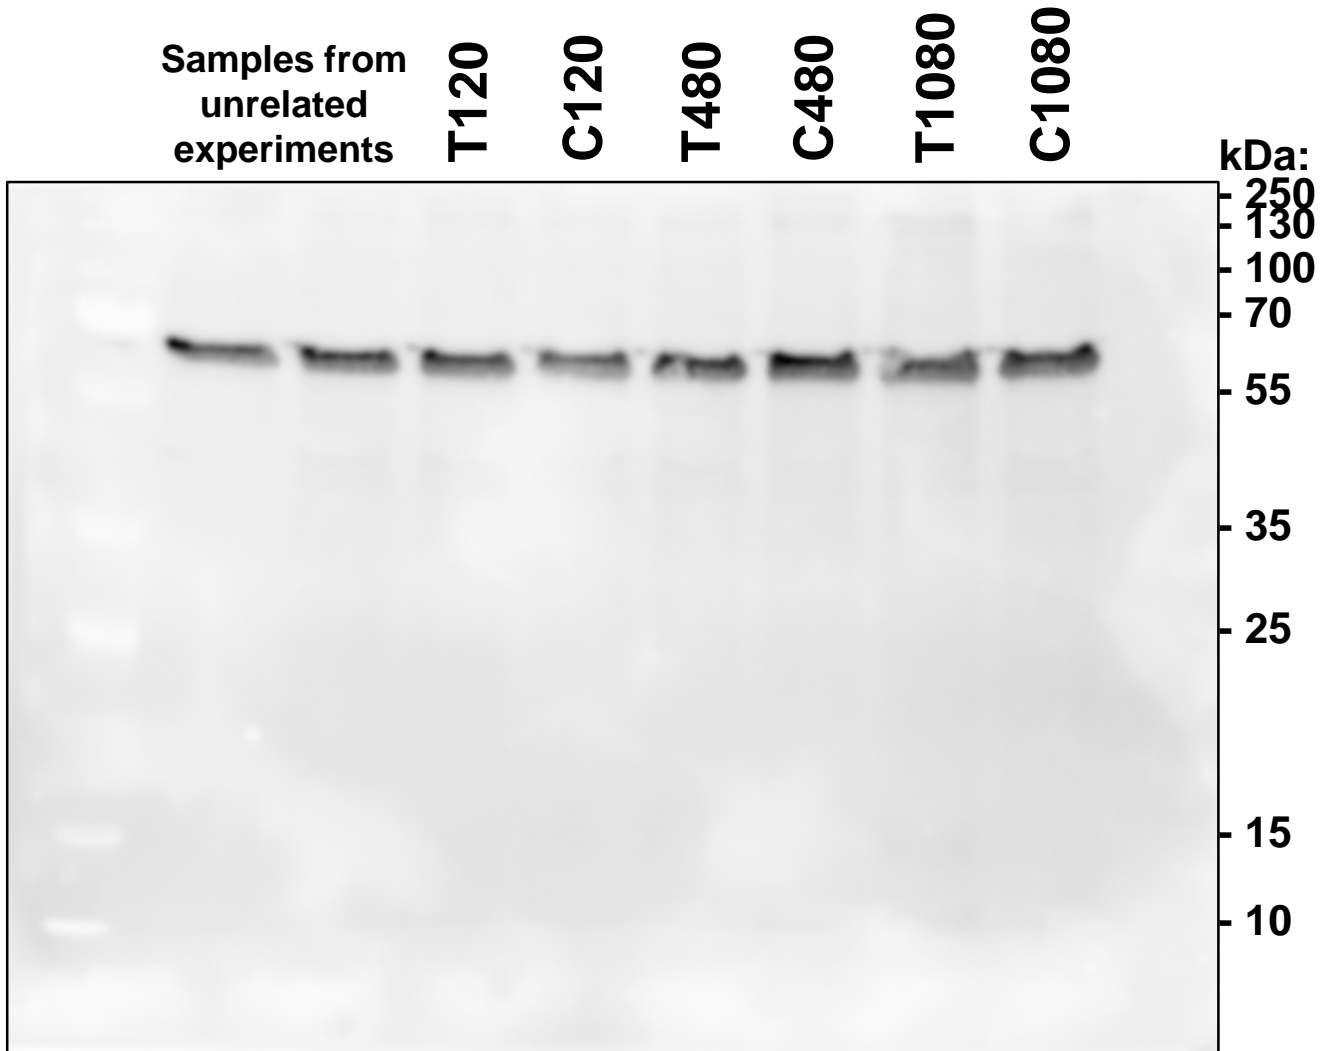

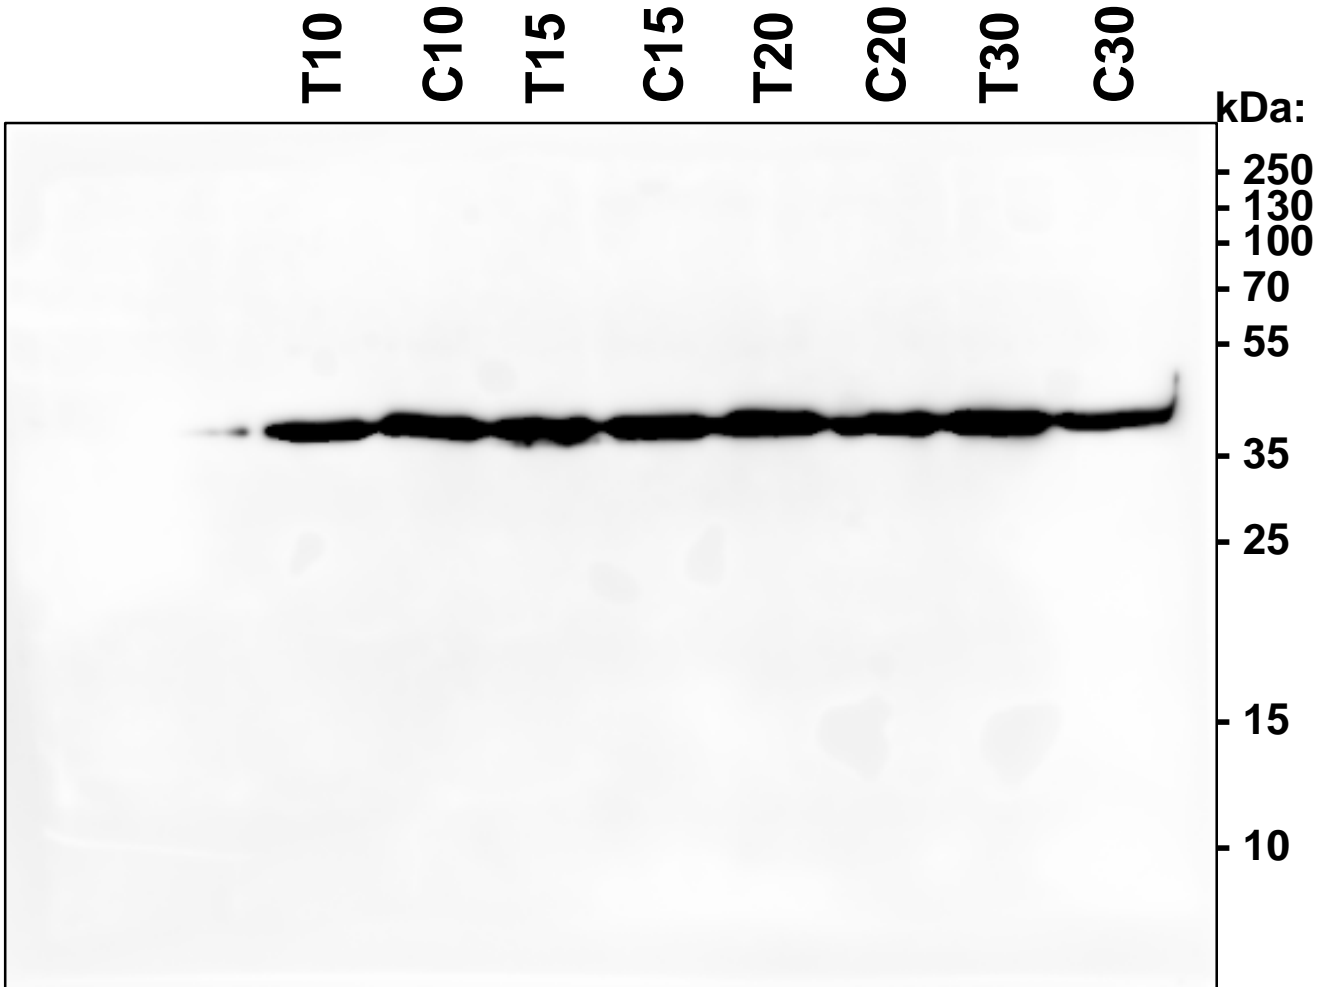

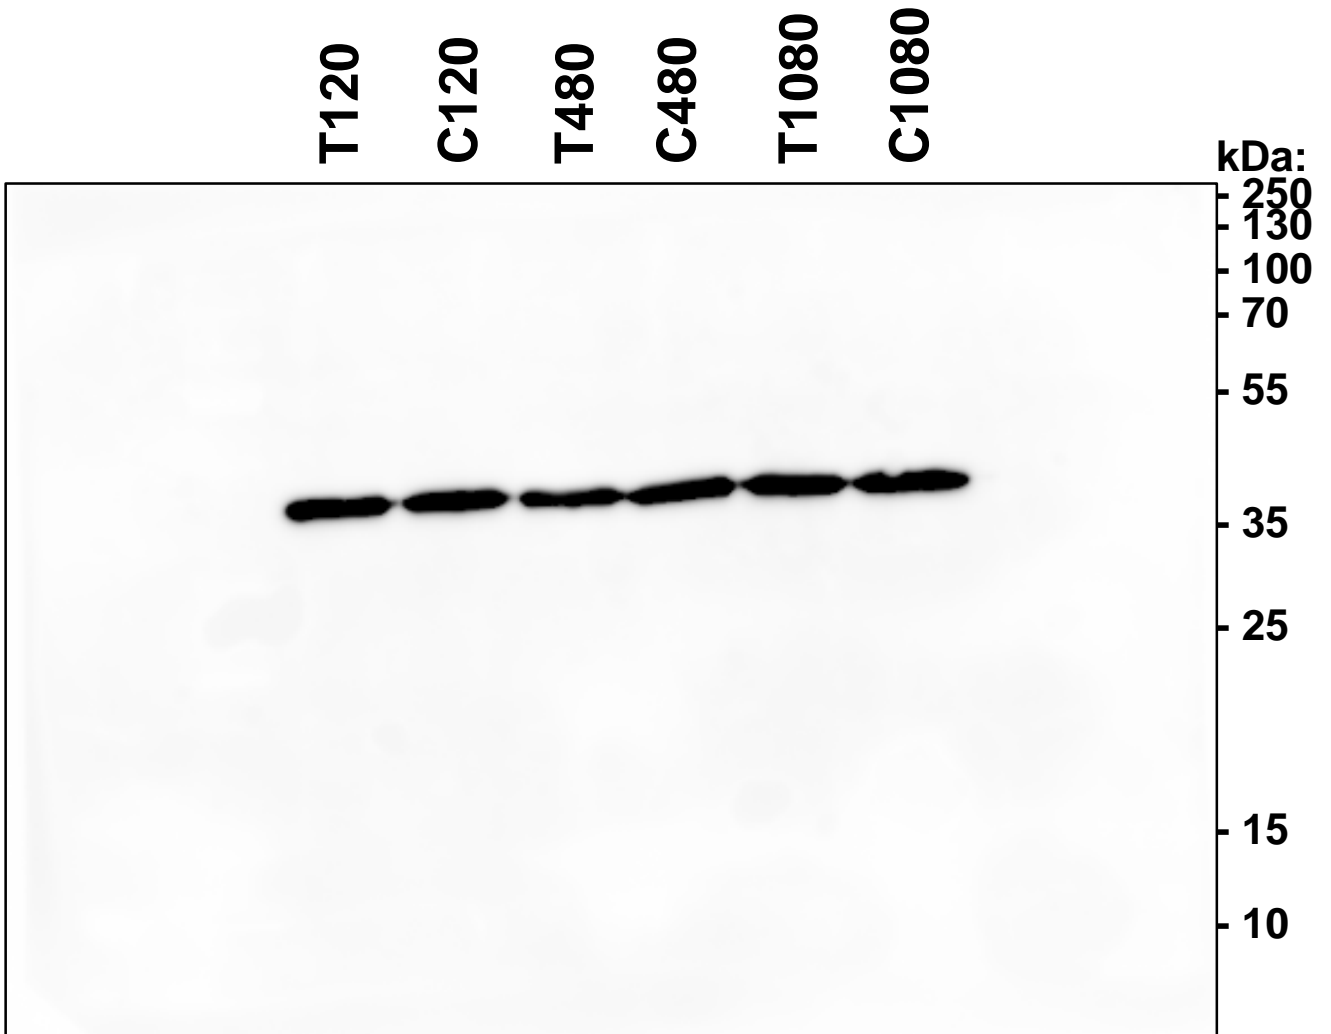

Supplement: pone.0233180.s008.pdf [file pone.0233180.s008.pdf]
