# Supplementary material for: THP-1 macrophage cholesterol efflux is impaired by palmitoleate through Akt activation
Source: PubMed Central journal article supplement (PMC7241781; doi:10.1371/journal.pone.0233180), 2020-05-21

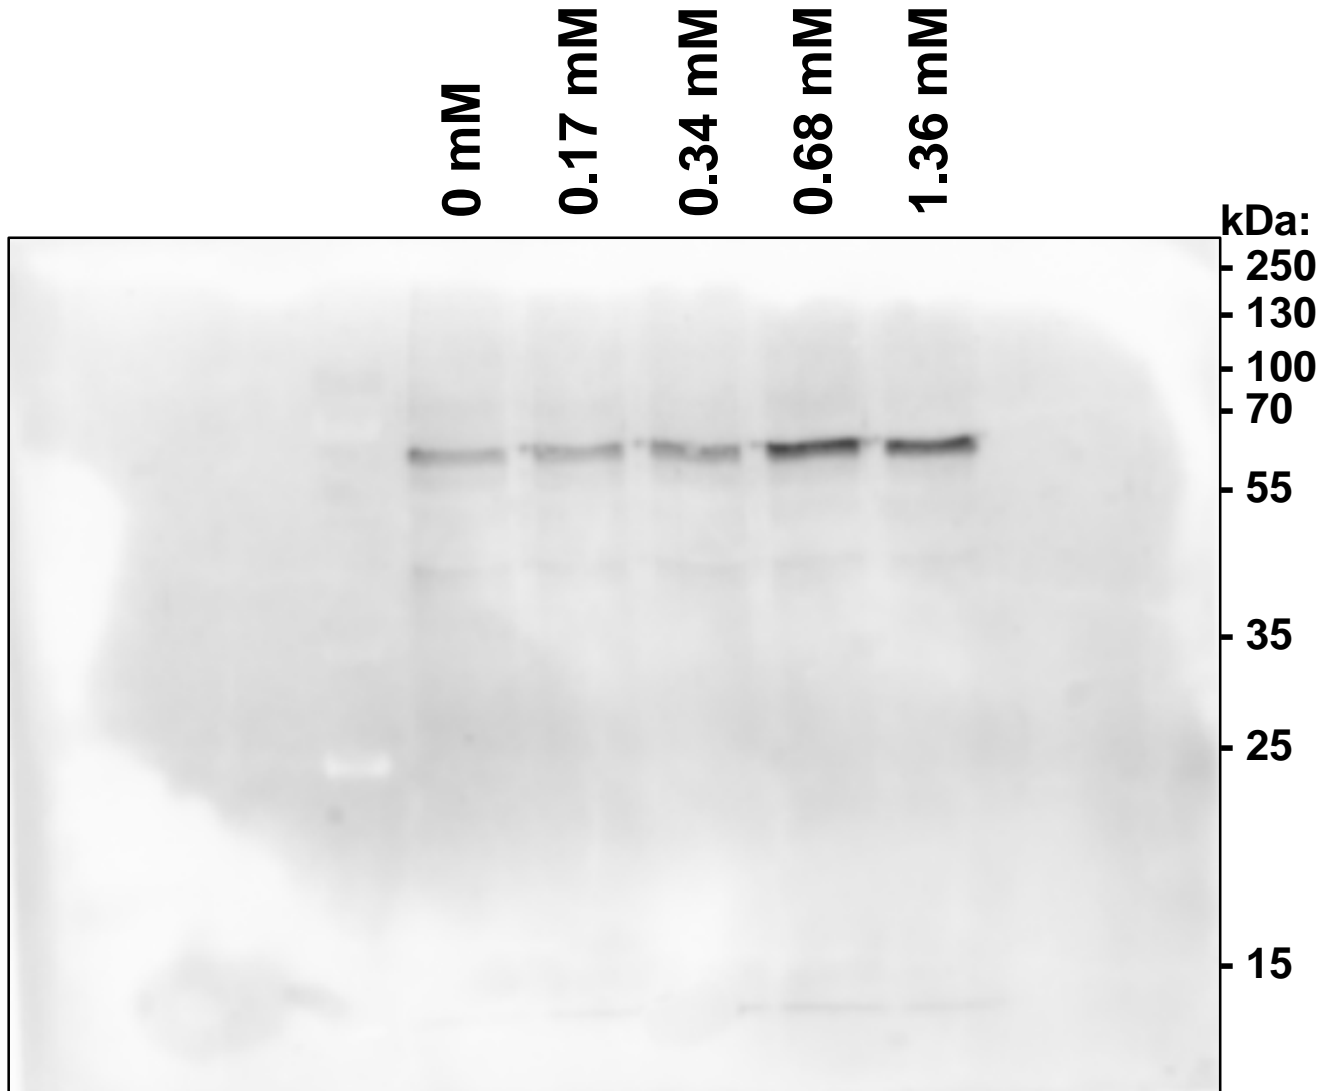

**0 mM**      **0.17 mM**      **0.34 mM**      **0.68 mM**      **1.36 mM**

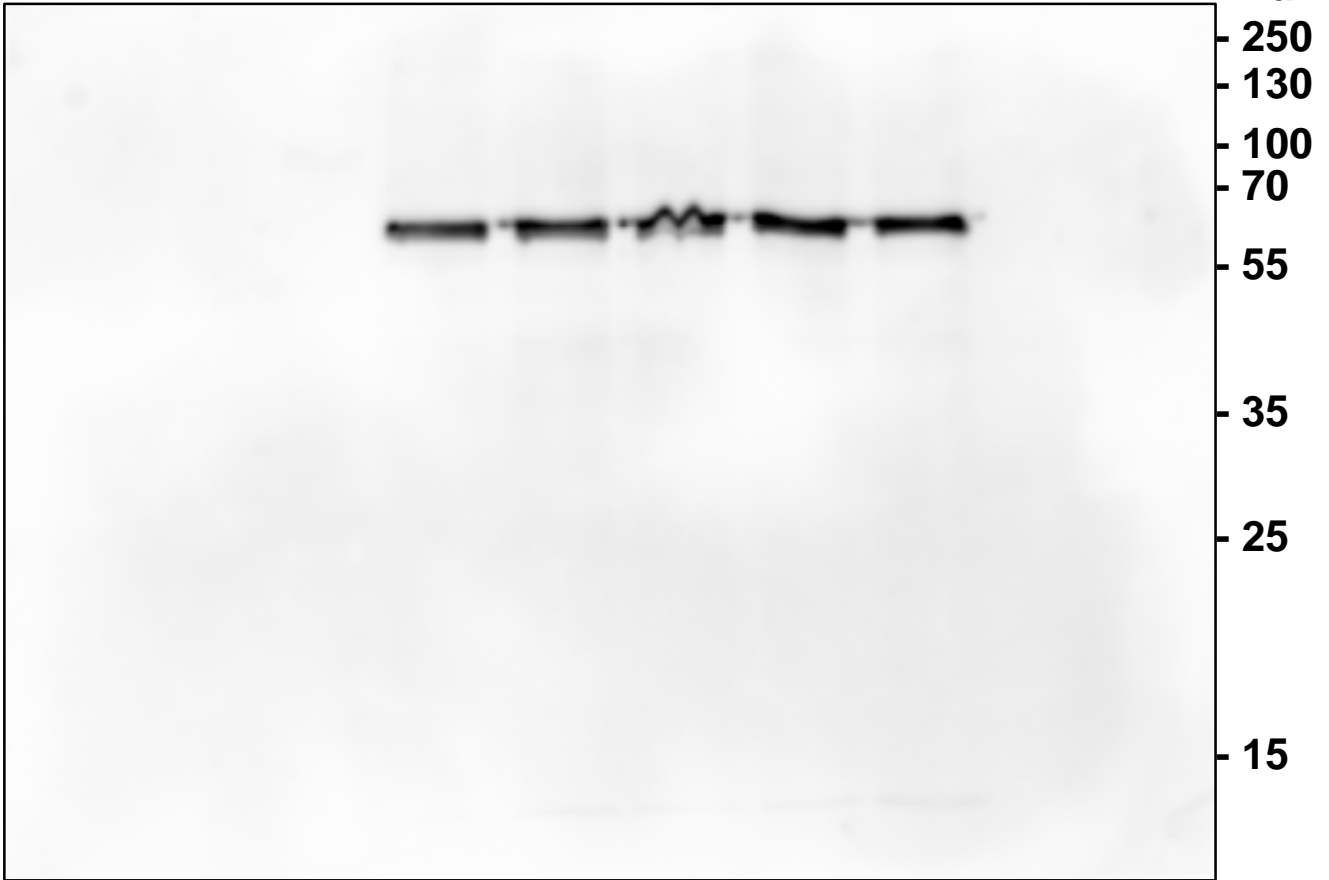

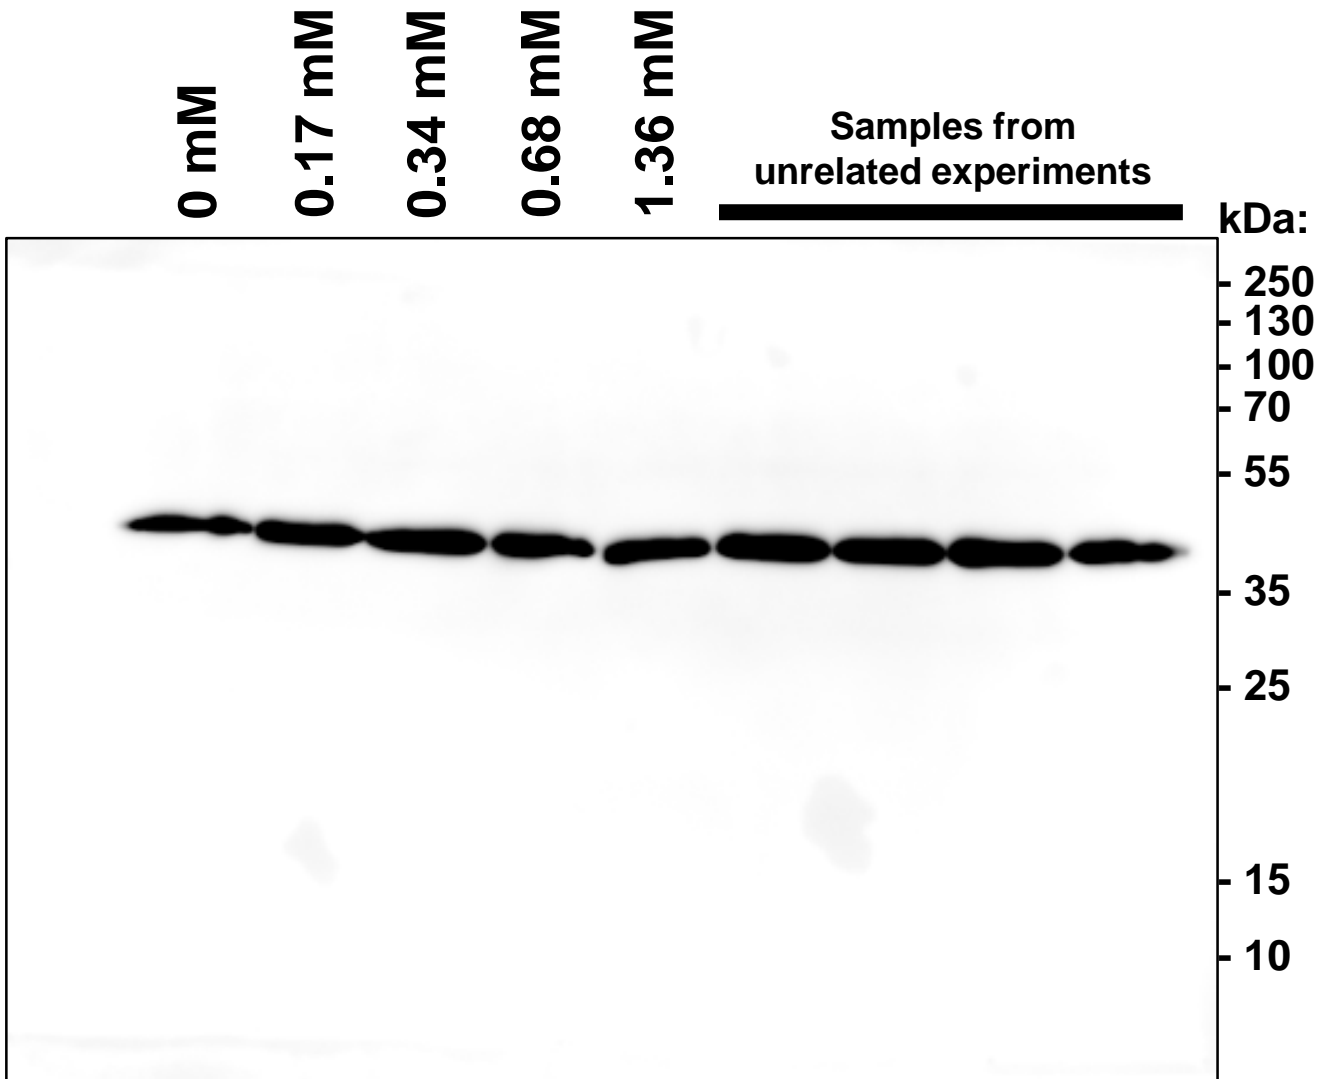

Supplement: pone.0233180.s009.pdf [file pone.0233180.s009.pdf]
