# Supplementary material for: THP-1 macrophage cholesterol efflux is impaired by palmitoleate through Akt activation
Source: PubMed Central journal article supplement (PMC7241781; doi:10.1371/journal.pone.0233180), 2020-05-21

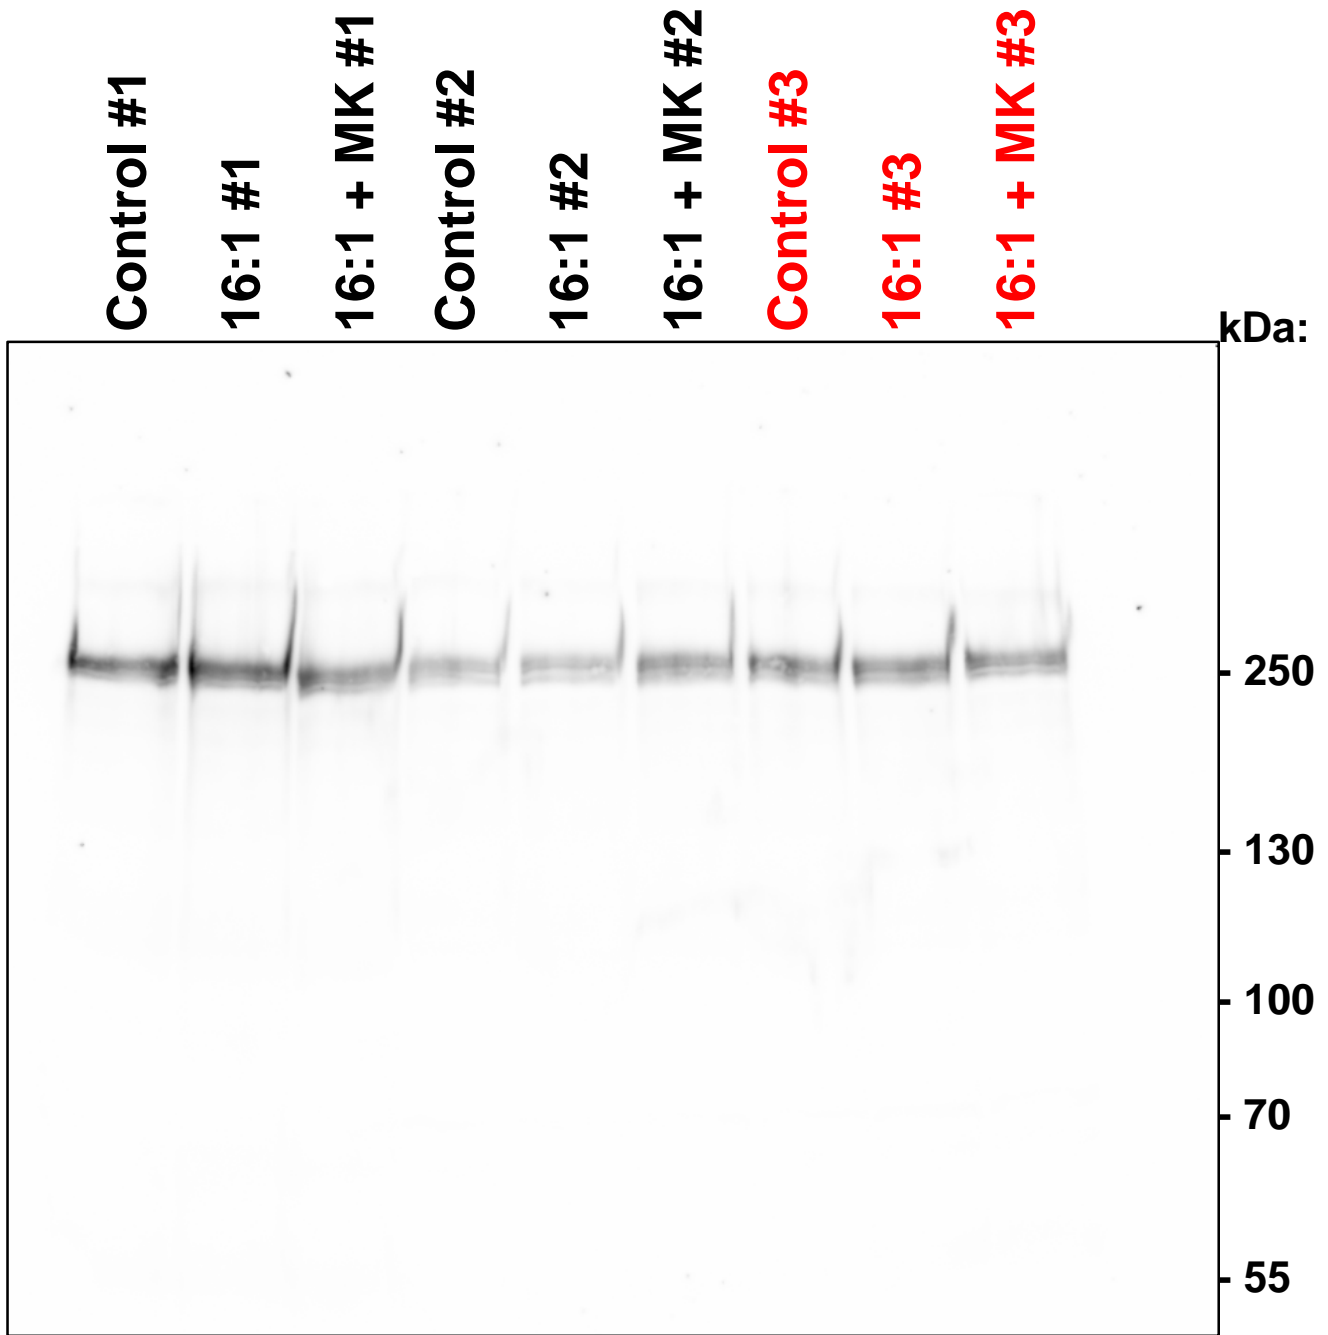

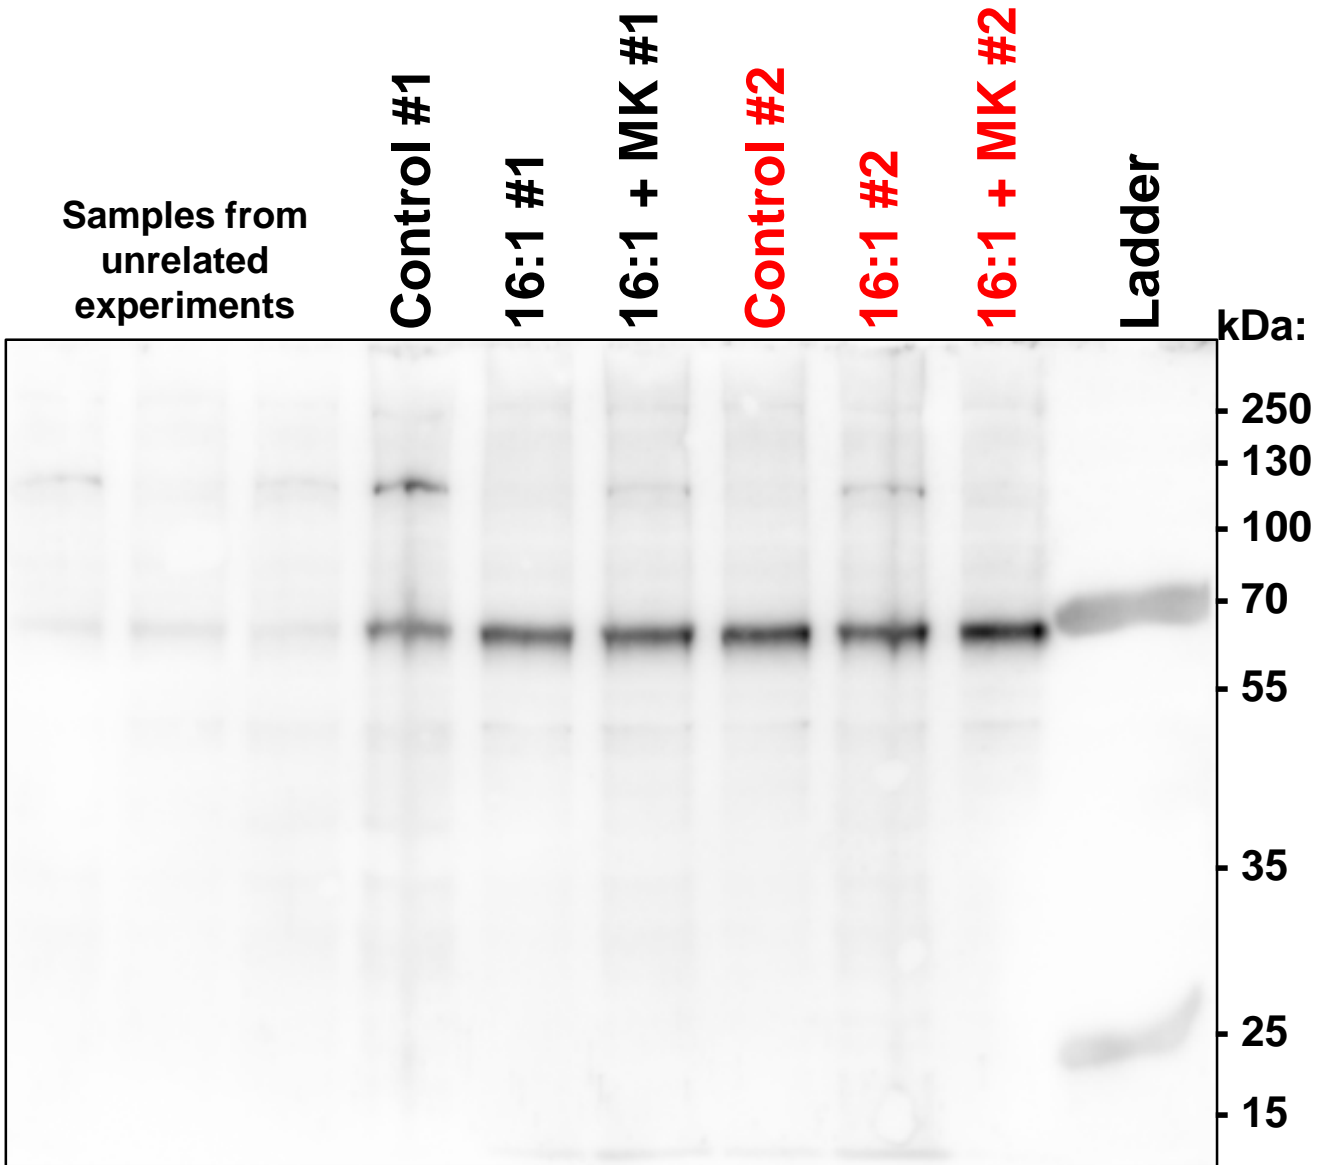

Samples from  
unrelated experiments

16:1

16:1 + MK

Control

16:1 (dup.)

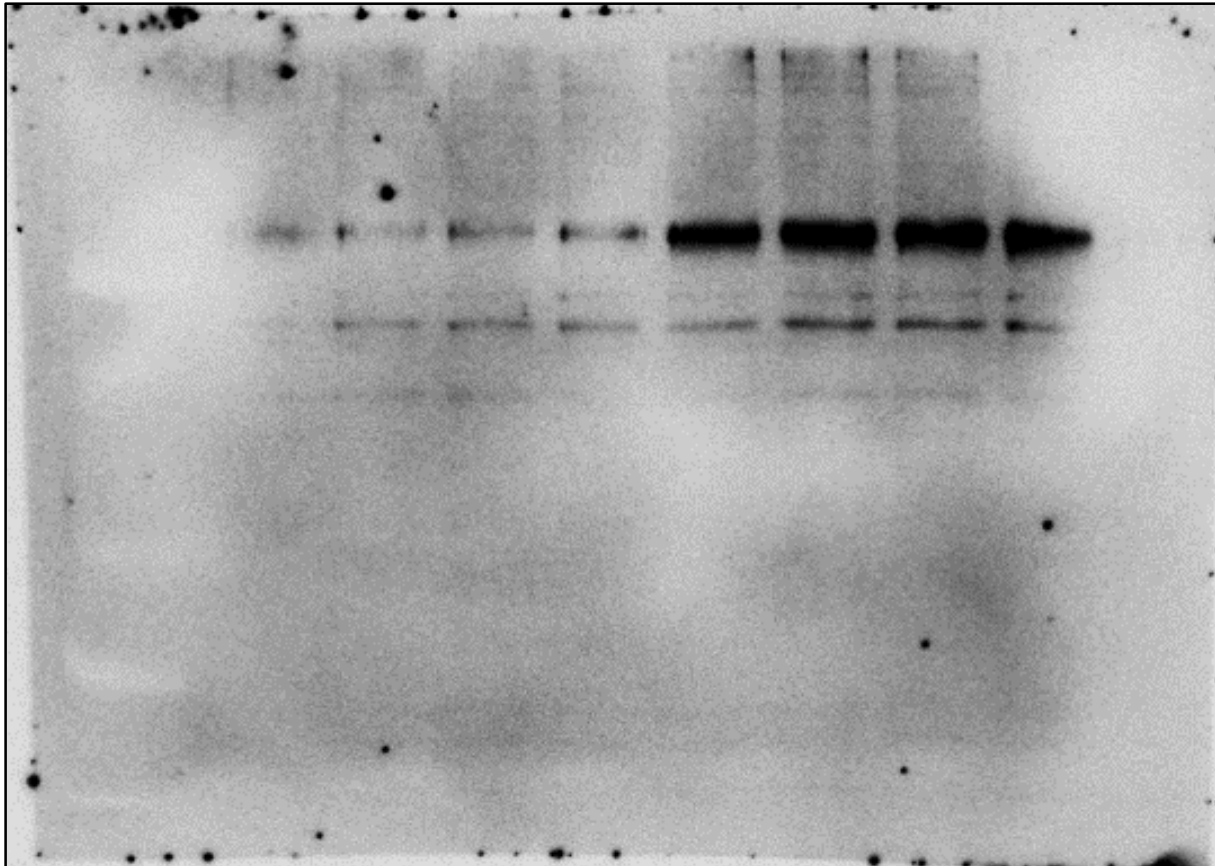

kDa:

250

130

100

70

55

35

25

15

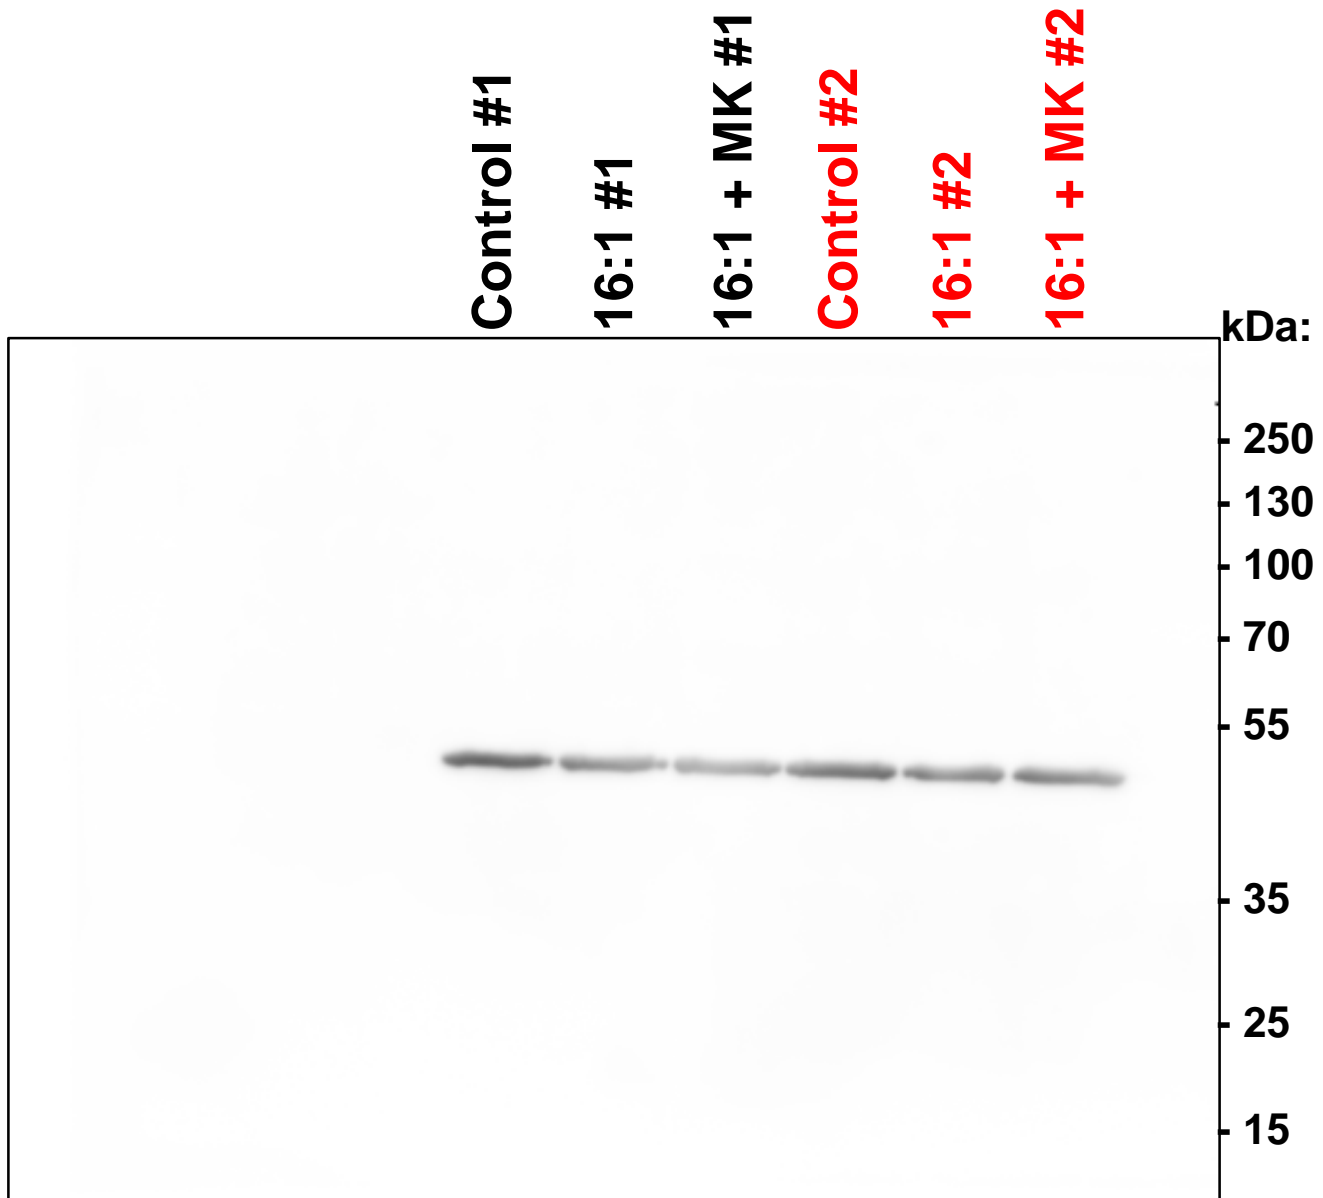

Supplement: pone.0233180.s012.pdf [file pone.0233180.s012.pdf]
