# Supplementary material for: THP-1 macrophage cholesterol efflux is impaired by palmitoleate through Akt activation
Source: PubMed Central journal article supplement (PMC7241781; doi:10.1371/journal.pone.0233180), 2020-05-21
Supplement: pone.0233180.s013.pdf [file pone.0233180.s013.pdf]

## 1 **Supporting materials and methods**

2

### 3 **Cholesterol efflux (for S3 Fig data)**

4 ApoA-I (Lee Biosolutions, Maryland Heights, MO, USA) was salt-exchanged using a PD-10  
5 desalting column (GE Healthcare) equilibrated with phosphate-buffered saline, and the protein  
6 concentration was measured using the absorbance at 280 nm and the molar absorption coefficient  
7 of 1.23 ml/ mg·cm [1]. Cholesterol efflux assays using THP-1 macrophages that were not treated  
8 with acetylated LDL were carried out as previously described [2]. In brief, cells were cultured in  
9 12-well plates and radiolabelled with 1  $\mu$ Ci/ml [ $^3$ H]cholesterol (PerkinElmer, Waltham, MA,  
10 USA). Following labelling, cells were incubated for 18 hours with media containing 23.7  $\mu$ M  
11 palmitoleate or vehicle control. After incubation without or with fatty acid, cells were incubated  
12 without or with 50  $\mu$ g/ml apoA-I, or 50  $\mu$ g/ml HDL (Lee Biosolutions) for 6 hours. After 6  
13 hours, media were collected and cells were lysed using 1 ml of 0.2 M NaOH for 30 minutes;  
14 [ $^3$ H]cholesterol from media and cell lysates were quantified by scintillation counting. The  
15 amount of [ $^3$ H]cholesterol effluxed was calculated as a percentage of [ $^3$ H]cholesterol effluxed  
16 into the medium per amount of total cell and medium [ $^3$ H]cholesterol. Background efflux (in the  
17 absence of apoA-I) was subtracted from efflux data to obtain apoA-I specific efflux. For  
18 cholesterol loading using acetylated LDL, during radiolabelling, cells were also incubated with  
19 50  $\mu$ g/ml acetylated LDL (Lee Biosolutions).

20

### 21 **Oil Red O Staining**

22 As described under Materials and Methods, THP-1 macrophages were incubated for 18  
23 hours with the total FFA mixture (with FFA concentrations matching those within the lipoprotein  
24 hydrolysis products generated by LPL), in the absence or presence of 100  $\mu$ M of the PI3K  
25 inhibitor LY294002. Following incubation, the cells were washed twice with phosphate-buffered  
26 saline (PBS, pH 7.4) and stained with 0.36% *w/v* Oil red O in 60% *v/v* isopropanol (Millipore,  
27 Toronto, ON Canada) for 15 minutes at room temperature. After 15 minutes, cells were washed  
28 three times with PBS and then incubated for 30 minutes with 1 ml isopropanol. The isopropanol  
29 (containing extracted stain) was removed and the absorbance at 520 nm was measured.

30

### 31 **Expression of ABCA1, ABCG1, and SR-BI mRNA**

32 As described under Materials and Methods, THP-1 macrophages were incubated for 18  
33 hours with the total FFA mixture (with FFA concentrations matching those within the lipoprotein  
34 hydrolysis products generated by LPL), in the absence or presence of 1  $\mu$ M of MK-2206. RNA  
35 was isolated and real-time PCR was carried out using previously reported primers and methods  
36 to determine *ABCA1*, *ABCG1*, *SCARB1*, and *ACTB* expression [2]. All data were corrected for  
37 primer pair efficiencies.

38

39

### 40 **Supplementary References**

41 1. Gillotte KL, Zaiou M, Lund-Katz S, Anantharamaiah GM, Holvoet P, Dhoest A, et al.

42 Apolipoprotein-mediated plasma membrane microsolubilization: role of lipid affinity and

- 43 membrane penetration in the efflux of cellular cholesterol and phospholipid. *J Biol Chem.*  
44 1999;274(4):2021-2028. doi: 10.1074/jbc.274.4.2021
- 45 2. Yang Y, Thyagarajan N, Coady BM, Brown RJ. Cholesterol efflux from THP-1  
46 macrophages is impaired by the fatty acid component from lipoprotein hydrolysis by  
47 lipoprotein lipase. *Biochem Biophys Res Commun* 2014;451(4):632-636. doi:  
48 10.1016/j.bbrc.2014.08.040
